# Supplementary material for: Genome-wide identification and multi-level analysis of the HSP gene superfamily in Aphidoletes aphidimyza：sHSP gene family expansion and its role in diapause regulation
Source: Research Square preprint supplement (doi:10.21203/rs.3.rs-7109494/v1), 2025-07-29
Supplement: Supplementary file 1 [file 3294f9e7475ee2e02aecc215.xlsx]

## Sheet: CbuP450_gene_primers
Supplementary Table 1 The qRT-PCR primers of AaphsHSP genes
Sequence ID	Primer ID	Primer Sequence
AasHSP08	AasHSP08-F	GAACGCTCGTTGTTACGCTC
AasHSP08	AasHSP08-R	GTCTTTGCCGATGTGCGATT
AasHSP10	AasHSP10-F	TCGGTACGGGTGTCTATCCA
AasHSP10	AasHSP10-R	CGTCTTTGCCAATGTGCGAT
AasHSP11	AasHSP11-F	ATCACTTCGGTTCGGGTGTC
AasHSP11	AasHSP11-R	AGAGAGCGAGCCTGACAATG
AasHSP12	AasHSP12-F	ATCGCACATTGGCAAAGACG
AasHSP12	AasHSP12-R	AAGCCTTCGGGCAATTCGTA
AasHSP13	AasHSP13-F	GGTACCTCGGTTCGGAAGTC
AasHSP13	AasHSP13-R	GTCTTTGCCGATGTGCGATT
AasHSP14	AasHSP14-F	AGCAGCTACCATCACTTCGG
AasHSP14	AasHSP14-R	CACTCTGAAGCCGTCTTTGC
AasHSP17	AasHSP17-F	CGGCGATACGAATTGCCAAA
AasHSP17	AasHSP17-R	CCTTCGATAGCTGGAGCTGG
AasHSP19	AasHSP19-F	TCAAATGTCCACCAGCTCCG
AasHSP19	AasHSP19-R	GACGCTCAATTTGGCTGGTC
AasHSP20	AasHSP20-F	TGTCGCTTATTCCGCAACCT
AasHSP20	AasHSP20-R	GTTGCCAGTGTTTGAGAGCG
AasHSP21	AasHSP21-F	ATCGCACATTGGCAAAGACG
AasHSP21	AasHSP21-R	AAGCCTTCGGGCAATTCGTA
AasHSP22	AasHSP22-F	CCCAAGCAGCTGGCATTTTT
AasHSP22	AasHSP22-R	TGGAATCCGTCTTTGCCGAA
AasHSP23	AasHSP23-F	TGTCGCTTATTCCGCACCTT
AasHSP23	AasHSP23-R	GCCGGTGTTTGAAAGCGAAT
AasHSP24	AasHSP24-F	TCAATCAAATGCCCGAACGC
AasHSP24	AasHSP24-R	TGCCGCTTAATATGGCTGGT
AasHSP25	AasHSP25-F	ACACATCGGCAAAGACGGAT
AasHSP25	AasHSP25-R	AAGCCTTCGGGCAATTCGTA
AasHSP29	AasHSP29-F	TGTCGCTCACTCCGAACATT
AasHSP29	AasHSP29-R	CGATGTGCGATTTTGCCAGA
AasHSP30	AasHSP30-F	TCGGATCGGGTGTCTATCCA
AasHSP30	AasHSP30-R	TTGCCAGTGTTTGAGAGCGA
AasHSP31	AasHSP31-F	TGTCGCTTATTCCGCACCTT
AasHSP31	AasHSP31-R	TGCCGTTGTTTGAAAGCGAG
RPL32	RPL32-F	GTCGTTTCAAGGGCCAATAC
RPL32	RPL32-R	GATGAAACGTTGTGGGCAAT
